# Supplementary material for: The Sensing Liver: Localization and Ligands for Hepatic Murine Olfactory and Taste Receptors
Source: PubMed Central journal article supplement (PMC7573564; doi:10.3389/fphys.2020.574082), 2020-10-06
Supplement: Table_1.pdf [file Table_1.pdf]

| <b>Supplemental Table 1: Custom TaqMan Array Cards</b> |                |
|--------------------------------------------------------|----------------|
| <b>Gene Symbol</b>                                     | <b>RefSeq</b>  |
| <b>Bitter Taste Receptors (N=35)</b>                   |                |
| Tas2r120                                               | NM_207023.1    |
| Tas2r109                                               | NM_207017.1    |
| Tas2r137                                               | NM_001025385.1 |
| Tas2r124                                               | NM_207026.1    |
| Tas2r108                                               | NM_020502.1    |
| Tas2r143                                               | NM_001001452.1 |
| Tas2r110                                               | NM_199155.2    |
| Tas2r135                                               | NM_199159.1    |
| Tas2r116                                               | NM_053212.1    |
| Tas2r129                                               | NM_207029.1    |
| Tas2r134                                               | NM_199158.1    |
| Tas2r126                                               | NM_207028.1    |
| Tas2r131                                               | NM_207030.1    |
| Tas2r105                                               | NM_020501.1    |
| Tas2r102                                               | NM_199153.2    |
| Tas2r104                                               | NM_207011.1    |
| Tas2r140                                               | NM_021562.1    |
| Tas2r125                                               | NM_207027.1    |
| Tas2r119                                               | NM_020503.2    |
| Tas2r136                                               | NM_181276.1    |
| Tas2r114                                               | NM_207019.1    |
| Tas2r106                                               | NM_207016.1    |
| Tas2r139                                               | NM_181275.1    |
| Tas2r118                                               | NM_207022.1    |
| Tas2r115                                               | NM_207020.1    |
| Tas2r103                                               | NM_053211.1    |
| Tas2r144                                               | NM_001001453.1 |
| Tas2r130                                               | NM_199156.1    |
| Tas2r113                                               | NM_207018.1    |
| Tas2r121                                               | NM_207024.1    |
| Tas2r123                                               | NM_207025.1    |
| Tas2r107                                               | NM_199154.1    |
| Tas2r122                                               | NM_001039128.1 |
| Tas2r117                                               | NM_207021.1    |
| Tas2r138                                               | NM_001001451.1 |
| <b>Taste Receptors for Umami and Sweet (N=3)</b>       |                |
| Tas1r3                                                 | NM_031872.2    |
| Tas1r1                                                 | NM_031867.2    |
| Tas1r2                                                 | NM_031873.1    |

| <b>Opsins (N=5)</b>               |                            |
|-----------------------------------|----------------------------|
| Opn4                              | NM_001128599.1;NM_013887.2 |
| Opn1sw                            | NM_007538.3                |
| Opn5                              | NM_181753.4                |
| Opn1mw                            | NM_008106.2                |
| Opn3                              | NM_010098.3                |
| <b>Olfactory Receptors (N=44)</b> |                            |
| Olfr78                            | NM_001168503.1;NM_130866.4 |
| Olfr322                           | NM_207693.1                |
| Olfr732                           | NM_146665.2                |
| Olfr558                           | NM_147093.3                |
| Olfr435                           | NM_146653.1                |
| Olfr13                            | NM_146652.1                |
| Olfr658                           | NM_001171477.1             |
| Olfr211                           | NM_146912.1                |
| Olfr177                           | NM_146996.2                |
| Olfr410                           | NM_146707.1                |
| Olfr56                            | NM_010999.2                |
| Olfr90                            | NM_146477.2                |
| Olfr1352                          | NM_147071.2                |
| Olfr166                           | NM_147068.1                |
| Olfr418                           | NM_146651.2                |
| Olfr355                           | NM_146625.1                |
| Olfr314                           | NM_001011760.2             |
| Olfr91                            | NM_182714.2                |
| Olfr287                           | NM_001011780.1             |
| Olfr288                           | NM_001011733.2             |
| Olfr411                           | NM_146709.2                |
| Olfr618                           | NM_147047.2                |
| Olfr273                           | NM_146824.1                |
| Olfr267                           | NM_146920.2                |
| Olfr71                            | NM_019486.1                |
| Olfr15                            | NM_008762.2                |
| Olfr26                            | NM_146783.2                |
| Olfr933                           | NM_146441.1                |
| Olfr646                           | NM_147056.1                |
| Olfr57                            | NM_147041.2                |
| Olfr714                           | NM_147033.2                |
| Olfr11                            | NM_146542.2                |
| Olfr873                           | NM_146561.1                |
| Olfr308                           | NM_146621.1                |
| Olfr935                           | NM_146746.1                |

Kurtz et al.

Sensory Receptors in the Liver

|                       |                            |
|-----------------------|----------------------------|
| Olfr1366              | NM_146283.2                |
| Olfr1428              | NM_146678.2                |
| Olfr1392              | NM_146470.2                |
| Olfr1393; Olfr10      | NM_146471.1;NM_206822.1    |
| Olfr691               | NM_147061.1                |
| Olfr693               | NM_146453.2                |
| Olfr99                | NM_146515.2                |
| Olfr31                | NM_147027.2                |
| Olfr545               | NM_146840.1                |
| <b>Reference Gene</b> |                            |
| Gapdh                 | NM_008084.3;NM_001289726.1 |
