# Supplementary material for: The Sensing Liver: Localization and Ligands for Hepatic Murine Olfactory and Taste Receptors
Source: PubMed Central journal article supplement (PMC7573564; doi:10.3389/fphys.2020.574082), 2020-10-06
Supplement: Table_2.pdf [file Table_2.pdf]

| <b>Supplemental Table 2: Chemical Screening</b>            |               |               |               |                |                                                      |
|------------------------------------------------------------|---------------|---------------|---------------|----------------|------------------------------------------------------|
| <b>Compounds Tested<sup>1</sup></b>                        | <b>Olfr16</b> | <b>Olfr57</b> | <b>Olfr99</b> | <b>Olfr177</b> | <b>CAS Number</b>                                    |
| <b><i>Odorant Mixes<sup>2</sup></i></b>                    |               |               |               |                |                                                      |
| BzB                                                        | o             | o             | o             | o              | 124-19-6, 111-71-7, 110-62-3                         |
| BzC                                                        | o             | o             | o             | o              | 6485-40-1, 97-53-0, 104-55-2                         |
| BzC-cinn                                                   | o             | o             | o             | o              | 6485-40-1, 97-53-0                                   |
| MA                                                         | o             | o             | o             | o              | 628-63-7, 106-68-3, 98-86-2                          |
| OXLK                                                       | o             | o             | o             | o              | 0431-03-08, 78-98-8, 64-19-7, 540-63-6, 78-93-3      |
| THI-DI                                                     | o             | o             | o             | o              | 1191-43-1, 540-63-6, 513-44-0, 1191-08-08, 4532-64-3 |
| <b><i>Physiologically Relevant Compounds</i></b>           |               |               |               |                |                                                      |
| Bile (Bovine/Ovine)                                        | NT            | NT            | o             | NT             | 8008-63-7                                            |
| Chenodeoxycholic acid                                      | NT            | o             | NT            | NT             | 474-25-9                                             |
| Cholic acid                                                | NT            | o             | o             | NT             | 81-25-4                                              |
| D-Fructose                                                 | NT            | o             | NT            | NT             | 7660-25-5                                            |
| Deoxycholic acid                                           | NT            | o             | o             | NT             | 83-44-3                                              |
| Fructose                                                   | NT            | NT            | o             | NT             | 7660-25-5                                            |
| Glucose                                                    | NT            | o             | o             | NT             | 2280-44-6                                            |
| Glucose-1-phosphate                                        | NT            | o             | o             | NT             | 59-56-3                                              |
| Glycerol                                                   | NT            | o             | o             | NT             | 56-81-5                                              |
| Mouse urine – Female                                       | NT            | o             | o             | NT             | n/a                                                  |
| Mouse urine – Male                                         | NT            | NT            | o             | NT             | n/a                                                  |
| Sodium glycochendeoxycholate                               | NT            | NT            | o             | NT             | 16564-43-5                                           |
| Taurocholic acid                                           | NT            | o             | o             | NT             | 81-24-3                                              |
| <b><i>Compounds Eliciting a Physiological Response</i></b> |               |               |               |                |                                                      |
| 3-methylbutan-1-ol                                         | NT            | o             | NT            | NT             | 123-51-3                                             |
| 3-Octanone                                                 | NT            | o             | NT            | NT             | 106-68-3                                             |
| Acetic acid                                                | NT            | o             | o             | NT             | 64-19-7                                              |
| Cyclohexanone                                              | NT            | o             | NT            | o              | 108-94-1                                             |
| Decanoic acid                                              | NT            | o             | o             | NT             | 334-48-5                                             |
| Diethyl disulfide                                          | NT            | o             | NT            | o              | 110-81-6                                             |
| Dimethyl disulfide                                         | NT            | o             | NT            | o              | 624-92-0                                             |
| Ethyl isobutyrate                                          | NT            | o             | NT            | o              | 97-62-1                                              |

|                             |    |    |    |    |            |
|-----------------------------|----|----|----|----|------------|
| Geraniol                    | NT | o  | NT | o  | 106-24-1   |
| N-nonanoic acid             | NT | o  | o  | NT | 112-05-0   |
| Nonanal                     | NT | o  | o  | NT | 124-19-6   |
| Phenethylamine              | NT | o  | o  | NT | 64-04-0    |
| Phenyl acetate              | NT | o  | NT | o  | 122-79-2   |
| Potassium Acetate           | NT | o  | NT | NT | 127-08-2   |
| Phenyl Acetate              | NT | o  | NT | o  | 1191-16-8  |
| Propionate                  | NT | o  | NT | NT | 72-03-7    |
| Pyrimidine                  | NT | NT | NT | o  | 289-95-2   |
| Pyruvaldehyde               | NT | o  | NT | NT | 78-98-8    |
| Quinine                     | NT | o  | o  | o  | 130-95-0   |
| Sodium pyruvate             | NT | o  | o  | NT | 113-24-6   |
| <b>Odorants</b>             |    |    |    |    |            |
| 1-Acetyl-3-methylpiperidine | NT | o  | o  | o  | 4593-16-2  |
| 1-butanol                   | NT | o  | o  | o  | 71-36-3    |
| 1-Octanol                   | NT | o  | o  | NT | 111-87-5   |
| 1,6-hexanedithiol           | NT | o  | NT | o  | 1191-43-1  |
| 2-cyclohexen-1-one          | NT | o  | o  | NT | 930-68-7   |
| 2-ethyl-3,5dimethylpyrazine | o  | o  | o  | x  | 13925-07-0 |
| 2-ethyl-3-methylpyrazine    | o  | NT | NT | x  | 15707-23-0 |
| 2-Heptanone                 | NT | o  | o  | NT | 110-43-0   |
| 2-hexanone                  | NT | o  | NT | NT | 591-78-6   |
| 2-pentanol                  | NT | o  | NT | NT | 6032-29-7  |
| 2-phenylethanol             | NT | o  | NT | o  | 60-12-8    |
| 2,3,5-trimethylpyrazine     | o  | NT | NT | x  | 14667-55-1 |
| 2,4 difluorobenzyl alcohol  | NT | o  | o  | o  | 56456-47-4 |
| 2,5-dimethylphenol          | NT | o  | NT | o  | 95-87-4    |
| 2'-coumaranone              | NT | o  | NT | o  | 553-86-6   |
| 3-Nitrotoluene              | NT | o  | o  | NT | 99-08-1    |
| Acetaldehyde                | NT | o  | o  | NT | 75-07-0    |
| Acetophenone                | o  | o  | NT | NT | 98-86-2    |

|                            |    |    |    |    |            |
|----------------------------|----|----|----|----|------------|
| Alpha-terpineol            | o  | o  | NT | NT | 98-55-5    |
| Amyl acetate               | NT | o  | NT | NT | 628-63-7   |
| Benzaldehyde               | NT | o  | o  | o  | 100-52-7   |
| Benzene                    | NT | o  | NT | o  | 71-43-2    |
| benzyl acetate             | NT | o  | NT | o  | 140-11-4   |
| Borneol                    | o  | x  | NT | NT | 10385-78-1 |
| Camphene                   | NT | o  | NT | o  | 79-92-5    |
| Camphor                    | o  | x  | o  | o  | 76-22-2    |
| Camphorquinone             | NT | o  | NT | NT | 10373-78-1 |
| Camphorsulfonic acid       | NT | o  | NT | NT | 3144-16-9  |
| Carvone                    | NT | o  | o  | o  | 99-49-0    |
| Cintronellol               | o  | o  | o  | o  | 106-22-9   |
| Coumarin                   | NT | o  | NT | o  | 91-64-5    |
| Cycloheptanol              | NT | o  | o  | NT | 502-41-0   |
| Cyclohexanecarboxylic acid | NT | o  | o  | o  | 98-89-5    |
| Cyclohexene oxide          | NT | o  | o  | NT | 286-20-4   |
| Dihydrocarvone             | NT | o  | NT | o  | 5524-05-0  |
| DL-Menthol                 | NT | o  | o  | NT | 1490-04-6  |
| Epsilon-Caprolactam        | NT | o  | o  | NT | 105-60-2   |
| Epsilon-Caprolactone       | NT | NT | o  | NT | 502-44-3   |
| Ethyl maltol               | NT | o  | o  | NT | 4940-11-8  |
| Ethyl vanillin             | NT | o  | o  | o  | 121-32-4   |
| Eucalyptol                 | o  | x  | NT | NT | 470-82-6   |
| Eugenol                    | NT | o  | o  | o  | 97-53-0    |
| Fenchone                   | o  | x  | o  | o  | 1195-79-5  |
| Fenchyl alcohol            | o  | x  | NT | NT | 2217-02-9  |
| Heptaldehyde               | NT | o  | o  | NT | 111-71-7   |
| L-carvone                  | NT | o  | o  | NT | 6485-40-1  |
| Linalool                   | NT | o  | NT | o  | 78-70-6    |
| Methyl hexanoate           | NT | o  | o  | NT | 106-70-7   |
| Methyl salicylate          | NT | o  | NT | o  | 119-36-8   |

|                      |    |    |    |    |            |
|----------------------|----|----|----|----|------------|
| Norcamphor           | NT | o  | NT | NT | 497-38-1   |
| Octan-3-ol           | NT | o  | NT | NT | 22658-92-0 |
| Octan-3-one          | NT | o  | NT | NT | 106-68-3   |
| Octanoic Acid        | NT | o  | o  | o  | 124-07-2   |
| Octanol              | NT | o  | o  | NT | 111-87-5   |
| Phenethyl alcohol    | NT | o  | o  | NT | 60-12-8    |
| Pinene               | o  | x  | o  | o  | 67762-73-6 |
| Pyrazine             | NT | NT | NT | x  | 290-37-9   |
| Pyridine             | NT | NT | NT | o  | 110-86-1   |
| Sodium metaperiodate | NT | o  | NT | NT | 7790-28-5  |
| Thujone              | NT | o  | NT | NT | 546-80-5   |
| Thymol               | NT | o  | NT | o  | 89-83-8    |
| Valeraldehyde        | NT | NT | o  | NT | 110-62-3   |
| Whiskey Lactone      | NT | o  | o  | NT | 39212-23-2 |

<sup>1</sup>All compounds tested compounds were screened at a minimum of two doses (100-300µm and 1-5mM)

<sup>2</sup>Composition of chemical mixes included in Materials and Methods

NT = Not Tested

o = No response

X = Response detected
