# Supplementary material for: The Sensing Liver: Localization and Ligands for Hepatic Murine Olfactory and Taste Receptors
Source: PubMed Central journal article supplement (PMC7573564; doi:10.3389/fphys.2020.574082), 2020-10-06
Supplement: Table_3.pdf [file Table_3.pdf]

**Supplemental Table 3: Gene-specific primers**

| <b>Murine OR</b> | <b>Forward Primer</b>     | <b>Reverse Primer</b>      | <b>Product length (bp)</b> |
|------------------|---------------------------|----------------------------|----------------------------|
| Olfr10           | CCTGGTAACCCTGTTGTGGT      | GGTGGTAAAGGGCCTGCAAT       | 181                        |
| Olfr1351         | TGAACACAAGACGCTGTGGA      | AGAAGGTAAGTCCGTTAGTCTGTT   | 548                        |
| Olfr1366         | CTGGTGGCTTTCTCTTGGGT      | TCAATACGGGGGCTACAACC       | 427                        |
| Olfr1386         | AAGAGCAGTTATTCTGAAAGCAAGG | CTCTTAGTCTGTGCCTCTCCC      | 150                        |
| Olfr1428         | TCTTCCTCAAGTTGGTCTGTGAA   | AGGAGCCTAGAATGAGCATGG      | 105                        |
| Olfr15           | GTATGTGGCAGTTTGTCCGGC     | ATGACGCTTACTGGGACCAC       | 276                        |
| Olfr1507         | CACCATCAAGCTGCCCTACT      | GGGTTCAGCAGAGGGGTTATG      | 366                        |
| Olfr1508         | CACCATCAAGCTGCCCTACT      | TCAGTAGAGGGGTAAACAGCAG     | 362                        |
| Olfr151          | TGCCGTAGGACTCATCGGTT      | CAGTGTTTTGTCCAGTGCGG       | 466                        |
| Olfr155          | GTGCCGTGCAGATGTTTCTC      | TCATTGCACCACTCTTCCCT       | 730                        |
| Olfr16           | TGGTCATTGTCCCACGGATG      | CAAGGCACACATTCCCTTGC       | 206                        |
| Olfr166          | CTTCTCTCTGGCTTTGTGTGG     | AAGGACTCTTGTGCATGGCCC      | 814                        |
| Olfr177          | CCACAGGAGCCTACATAGCAG     | TTTTCTTCATTGCTCTTTTCATCAC  | 489                        |
| Olfr267          | TCACTGTCCTGGATTCACGC      | GGGAACTCACGCAAGCTAGT       | 432                        |
| Olfr308          | AGCTGCAGTCCCAAAGCTC       | CAGATGGCAAGGTAGCGGTC       | 156                        |
| Olfr418          | AACCCCTTGAGGTACTIONCGGT   | TAGGCAATGGAGGCACAACC       | 392                        |
| Olfr43           | ACTTCATGATAGGCTTGGCAAAT   | GTCAGGGGCCGGAAATACAT       | 484                        |
| Olfr544          | CCTTATTGTCTTTGACTGCAACAT  | TCGGTTGAAGATGCGAACAG       | 304                        |
| Olfr545          | CCATTGTCTACCGTGTGGCT      | AGGAATGACCTTACCAGGTGC      | 148                        |
| Olfr554          | GCTGTGGTAAGGGTAGAGCG      | CAAGGAAGATGCCCGACTCA       | 221                        |
| Olfr558          | AGGCTGTCCTCATCAACCAA      | TGGAGTCGGTGGTCGTGTAT       | 169                        |
| Olfr56           | CCTTTTCGACACCCTGCTCT      | AACATTGCTGCCCCGTAGAA       | 192                        |
| Olfr57           | AGCACAAGACGCTGTGGATT      | GCTGTCTTTATGTCTTTGTTCCCTCA | 491                        |
| Olfr6            | TCACTGGGTCACTGCACAAG      | TGGATAGCGAAGAGGCCAAC       | 248                        |
| Olfr646          | CTCACCCATCGCTTTGGTCA      | GCCGACTCCGAATCTCCTTG       | 133                        |
| Olfr691          | TGTGCTAGTTGGCATCCCTG      | ATGGGGGACGATGTTGGTTC       | 493                        |
| Olfr73           | CTGTGCCATGCTGGTATTGG      | ACAGATGTGTCAGAGCGTGA       | 162                        |
| Olfr78           | AAGCGACTGGCTTTCTGTCA      | GCCTTAGCTCGCTCAGACTT       | 221                        |
| Olfr873          | TCGCCTCTGTGGCTCTTTAG      | TAAGGAGTTGTGCAGGGTCAC      | 143                        |
| Olfr90           | TCCTGGGATGCTTTGTCCAG      | AACTACTGACTCCACTAGGCCA     | 194                        |
| Olfr904          | CTGCACCAGCACCTATGTCA      | CAAATTTCCATCTGCTCAGGGT     | 369                        |
| Olfr918          | GCTGACTGGAAATGGCTCCT      | ATACATGAATGCCCTGACCC       | 775                        |
| Olfr99           | CACTGCGCTACTCAGCTCTC      | GAAGTGCACGTGGACAATGCT      | 343                        |
|                  |                           |                            |                            |
| <b>Murine TR</b> | <b>Forward Primer</b>     | <b>Reverse Primer</b>      | <b>Product length (bp)</b> |
| Tas1r1           | CCTTTCAGGGGCATGCAGTTA     | GCTGCCCGTAGTCACCATAG       | 766                        |

|                         |                       |                       |                                    |
|-------------------------|-----------------------|-----------------------|------------------------------------|
| Tas1r2                  | CTACAACCTCATGCAGGCCA  | CTCCTGGAAGGCAATGCAGA  | 514                                |
| Tas1r3                  | GAGGAACATGTGATGGGGCA  | CCCCGAAGGTAGCTGCATAG  | 968                                |
| Tas2r106                | GCACAGAAATGTTTCCTGGCA | GTCACTCTGACGTCCTTGTCT | 453                                |
| Tas2r108                | AGTCGCAGAATTGCCTCTCC  | GCCTCATAGCACCCATGTG   | 577                                |
| Tas2r126                | TCCTCTTCAGTTTGGGCACC  | CGGACACCAAGATAGAGCCC  | 285                                |
| Tas2r135                | GAGTGGCCATCAACCTTGGA  | GCAGAACTGAGTACCAGCGT  | 288                                |
| Tas2r137                | GCCCACAAAAGAGCCATGAG  | TGGGAGCATGGCCACAAAT   | 219                                |
| Tas2r138                | AGCTTTCCTGGTTTCCTCGG  | GGAGGAACCTTGTGGACTGG  | 366                                |
| Tas2r143                | AGAGTGGATGAGGAACCGGA  | GCCATGGTATGTGCCTGAGT  | 585                                |
| <b>Murine<br/>OPN</b>   | <b>Forward Primer</b> | <b>Reverse Primer</b> | <b>Product<br/>length<br/>(bp)</b> |
| OPN1SW                  | CATGCACTGATGGTGGTCCT  | GGGATGGTGACAAGCCGTAA  | 419                                |
| OPN3                    | GTACTCGGGGAACCGTAGTG  | AACGTTTCATAGGCCAGCACA | 410                                |
| OPN4                    | GCTGTCTTTGGCATCACTTCC | ACGAGTGCCGTTTCGTCTTT  | 119                                |
| <b>OR<br/>Signaling</b> | <b>Forward Primer</b> | <b>Reverse Primer</b> | <b>Product<br/>length<br/>(bp)</b> |
| GNA1                    | AGGATCCTGCACGTCAATGG  | CGCCACGTAAATGATCGCAG  | 519                                |
| Adcy3                   | CCTTGCCCAACTTTGCTGAC  | TCACAAAGATGGGACCTCGC  | 543                                |
