# Supplementary material for: The Sensing Liver: Localization and Ligands for Hepatic Murine Olfactory and Taste Receptors
Source: PubMed Central journal article supplement (PMC7573564; doi:10.3389/fphys.2020.574082), 2020-10-06
Supplement: Table_4.pdf [file Table_4.pdf]

| <b>Supplementary Table 4: Full Length Primers</b> |                                                                        |                                                                      |                            |
|---------------------------------------------------|------------------------------------------------------------------------|----------------------------------------------------------------------|----------------------------|
| <b>Murine OR</b>                                  | <b>Forward Primer</b>                                                  | <b>Reverse Primer</b>                                                | <b>Product length (bp)</b> |
| Olfr90                                            | ATGGTCAACCAGAGCTCCCC                                                   | CAGCCGGGCTTCACTTCC                                                   | 932                        |
| Olfr78                                            | ATGAGTTCCTGCAACTTCACCC                                                 | CACGTGTTTCCCCCAGCTTC                                                 | 962                        |
| Olfr308                                           | ATGATCACAGAGAATTGGACTCT                                                | TCACTTTCTCTTCCATTTCTTCCCT                                            | 927                        |
| Olfr1366                                          | ATGGAAC TTTACTTCTCTCTATAT<br>CTC                                       | TCACTTGGAACATATTTTGCTC                                               | 987                        |
| Olfr691                                           | ATGATTCATAGCAACATCACCCC                                                | TCATCCCAAAGGTGAAGAACA                                                | 969                        |
| Olfr558                                           | ATGGTGGGCTTCAATAGCAA                                                   | CTAGTGATCTGAAGTGTGTGTGG                                              | 954                        |
| Olfr57                                            | ATGGAAACAGGAAATGACACTC<br>A                                            | TTATGAAGGTGAATCCATTGATCT<br>GC                                       | 960                        |
| Olfr646                                           | ATGAGCGAAAGTCTCCCAGTC                                                  | TCATACTAAGTCCTTCCCCAAGTG                                             | 939                        |
| Olfr15                                            | ATGGAGGTGGACAGCAACAGCT                                                 | TCAGCTGGCTCCTCTTCCTTTC                                               | 939                        |
| Olfr177                                           | ATGACTGAGGACA ACTACTCCT                                                | TTATAATCTTTTCTTCATTGCTCTT<br>TT                                      | 930                        |
| Olfr545                                           | ATGTTGGGTTGGAGCAATGG                                                   | TCAGGGGCCTGCACTCAG                                                   | 951                        |
| Olfr873                                           | ATGTTCA TTTTCAAAGCTGTTC<br>A                                           | TTACAACATTCTTCTGTGAAGTCT<br>CT                                       | 960                        |
| Olfr56                                            | ATGGGAATATGGCTGAACGAAT<br>C                                            | TCAATGTTGGCTGCCAACCC                                                 | 948                        |
| Olfr267                                           | CTTTCTCCAACAAGACGGGCGT<br>GGTGGAATTCATGCCAGGAGAA<br>AATGTCACTGTTTGGAGC | GGCGCAGAACTGGTAGGTATGGA<br>AGATCCCTCGAGTCACACACTTGG<br>TGCCAAGGGCAG  | 939                        |
| Olfr99                                            | CTTTCTCCAACAAGACGGGCGT<br>GGTGGAATTCATGAACTGCAGTC<br>AGGCT             | GGCGCAGAACTGGTAGGTATGGA<br>AGATCCCTCGAGCTACTCCATGTT<br>TAGGATTCTCCTC | 915                        |
| Olfr16                                            | ATGCAGAGAAATAACTTCACTGA                                                | TTAAGAAGTGTTTCTGCCCA                                                 | 930                        |
| <b>Murine TR</b>                                  | <b>Forward Primer</b>                                                  | <b>Reverse Primer</b>                                                | <b>Product length (bp)</b> |
| Tas2r106                                          | ATCTGTAGAGATGCTGACTGTAG<br>CAGAAGG                                     | CTACCATGTCACTCTGACGTCCTT<br>GTC                                      | 937                        |
| Tas2r108                                          | ATGCTCTGGGAACTGTATGT                                                   | CTACTTGTAGAAACAGAAAATCTTC<br>T                                       | 894                        |
| Tas2r126                                          | ATGCTACCAACATTATCAGTTTTT<br>T                                          | CTAGGCCACCCAGAATCCCC                                                 | 927                        |

|                       |                                           |                                            |                                    |
|-----------------------|-------------------------------------------|--------------------------------------------|------------------------------------|
| Tas2r135              | ATTCGAGAGACTTCTTAGAGCAA<br>CAAACCTACCCTTC | TCAGCAGCAGCCCCTCTTTATCAC<br>C              | 1002                               |
| Tas2r137              | ATGAGATTTATGAACAGAACAAG<br>CA             | TTATGAAGCAGAGGGTCCCT                       | 1002                               |
| Tas2r138              | ATGCTGAGTCTGACTCCTGTC                     | TCAGAGTGTCTGGGAGGA                         | 996                                |
| Tas2r143              | ATGCCCTCCACACCCACATT                      | CTAAAACCTCATCTTCAGGGCCT                    | 882                                |
| Tas1r1                | ATG CTT TTC TGG GCA GCT<br>CAC CTG C      | T CAG GTA GTG CCG CAG CGC                  | 2528                               |
| Tas1r2                | ATG GGA CCC CAG GCG AGG                   | CTA GCT CTT CCT CAT CGT GTA<br>GCC CTG AAT | 2531                               |
| Tas1r3                | ATG CCA GCT TTG GCT ATC ATG<br>GGT CTC    | TCA TTC ATT GTG TCC CTG AGC<br>TGC CT      | 2576                               |
| <b>Murine<br/>OPN</b> | <b>Forward Primer</b>                     | <b>Reverse Primer</b>                      | <b>Product<br/>length<br/>(bp)</b> |
| OPN1SW                | ATGTCAGGAGAGGATGACTTTTA<br>CC             | TCAGTGAGGGCCAACCTTTGCT                     | 1041                               |
| OPN3                  | ATGTAICTCGGGGAACCGTAG                     | TTATAGAGGACGCACTTGGATGA                    | 1203                               |
